# Supplementary material for: Peripheral site modification in a family of dinuclear [Dy2(hynad)2–6(NO3)0–6(sol)0–2]0/2− single-molecule magnets bearing a {Dy2(μ-OR)2}4+ diamond-shaped core and exhibiting dissimilar magnetic dynamics
Source: Royal Society of Chemistry journal article supplement (doi:10.1039/d3dt02596a), 2023-01-01
Supplement: d3dt02596a1.pdf [file d3dt02596a1.pdf]

## ELECTRONIC SUPPORTING INFORMATION

### **Peripheral site modification in a family of dinuclear $[\text{Dy}_2(\text{hynad})_2\text{-}6(\text{NO}_3)_{0-6}(\text{sol})_{0-2}]^{0/2-}$ single-molecule magnets bearing a $\{\text{Dy}_2(\mu\text{-OR})_2\}^{4+}$ diamond-shaped core and exhibiting dissimilar magnetic dynamics**

Alexandros S. Armenis,<sup>†</sup> Dimitris I. Alexandropoulos,<sup>‡</sup> Anne Worrell,<sup>△</sup> Luís Cunha-Silva,<sup>◇</sup> Kim R. Dunbar,<sup>‡</sup> and Theocharis C. Stamatatos<sup>\*,†,#</sup>

<sup>†</sup> Department of Chemistry, University of Patras, 26504 Patras, Greece. E-mail: [thstama@upatras.gr](mailto:thstama@upatras.gr); Tel: +30 2610 996730.

<sup>‡</sup> Department of Chemistry, Texas A&M University, College Station, Texas 77843, USA.

<sup>△</sup> Department of Chemistry, 1812 Sir Isaac Brock Way, Brock University, L2S 3A1 St. Catharines, Ontario, Canada

<sup>◇</sup> LAQV/REQUIMTE & Department of Chemistry and Biochemistry, Faculty of Sciences, University of Porto, 4169-007 Porto, Portugal

<sup>#</sup> Institute of Chemical Engineering Sciences, Foundation for Research and Technology – Hellas (FORTH/ICE – HT), Platani, P.O. Box 1414, 26504, Patras, Greece

**Table S1.** Crystallographic data for compounds **1-4**.

| Parameter                                                              | <b>1</b>                                                                       | <b>2·2MeCN</b>                                                                  | <b>3·2DMF</b>                                                                  | <b>4·2DMF</b>                                                                  |
|------------------------------------------------------------------------|--------------------------------------------------------------------------------|---------------------------------------------------------------------------------|--------------------------------------------------------------------------------|--------------------------------------------------------------------------------|
| Formula                                                                | C <sub>30</sub> H <sub>26</sub> Dy <sub>2</sub> N <sub>8</sub> O <sub>20</sub> | C <sub>36</sub> H <sub>42</sub> Dy <sub>2</sub> N <sub>12</sub> O <sub>24</sub> | C <sub>54</sub> H <sub>42</sub> Dy <sub>2</sub> N <sub>8</sub> O <sub>22</sub> | C <sub>78</sub> H <sub>54</sub> Dy <sub>2</sub> N <sub>8</sub> O <sub>22</sub> |
| $F_w / \text{g}\cdot\text{mol}^{-1}$                                   | 1143.59                                                                        | 1351.81                                                                         | 1479.95                                                                        | 1780.29                                                                        |
| Crystal system                                                         | Triclinic                                                                      | Triclinic                                                                       | Triclinic                                                                      | Triclinic                                                                      |
| Space group                                                            | $P\bar{1}$                                                                     | $P\bar{1}$                                                                      | $P\bar{1}$                                                                     | $P\bar{1}$                                                                     |
| $a / \text{Å}$                                                         | 9.7495(3)                                                                      | 10.9643(3)                                                                      | 10.8846(5)                                                                     | 12.1938(8)                                                                     |
| $b / \text{Å}$                                                         | 10.3059(3)                                                                     | 11.4838(3)                                                                      | 12.5023(6)                                                                     | 12.3905(8)                                                                     |
| $c / \text{Å}$                                                         | 10.8266(2)                                                                     | 11.7527(5)                                                                      | 14.2375(6)                                                                     | 14.0035(9)                                                                     |
| $\alpha / ^\circ$                                                      | 91.834(2)                                                                      | 115.252(3)                                                                      | 64.886(4)                                                                      | 94.080(3)                                                                      |
| $\beta / ^\circ$                                                       | 112.263(2)                                                                     | 109.857(3)                                                                      | 84.877(3)                                                                      | 93.689(3)                                                                      |
| $\gamma / ^\circ$                                                      | 112.030(3)                                                                     | 96.441(2)                                                                       | 76.325(4)                                                                      | 94.619(3)                                                                      |
| $V / \text{Å}^3$                                                       | 913.81(5)                                                                      | 1199.95(8)                                                                      | 1704.45(15)                                                                    | 2098.3(2)                                                                      |
| $Z$                                                                    | 1                                                                              | 1                                                                               | 1                                                                              | 1                                                                              |
| $T / K$                                                                | 173.0(1)                                                                       | 173.0(1)                                                                        | 150(2)                                                                         | 150(2)                                                                         |
| Radiation / $\mu$ (mm <sup>-1</sup> )                                  | Cu K $\alpha$ / 22.497                                                         | Cu K $\alpha$ / 17.337                                                          | Cu K $\alpha$ / 12.224                                                         | Mo K $\alpha$ / 1.840                                                          |
| $\rho_{\text{calcd}} / \text{g cm}^{-3}$                               | 2.078                                                                          | 1.871                                                                           | 1.442                                                                          | 1.409                                                                          |
| Reflections                                                            | 8071/3221                                                                      | 7372/4225                                                                       | 15758/5965                                                                     | 62031/7395                                                                     |
| collected/unique ( $R_{\text{int}}$ )                                  | (0.0344)                                                                       | (0.0446)                                                                        | (0.0632)                                                                       | (0.0602)                                                                       |
| Reflections with $I > 2\sigma(I)$                                      | 3037                                                                           | 3823                                                                            | 5288                                                                           | 6965                                                                           |
| No. of parameters                                                      | 273                                                                            | 339                                                                             | 427                                                                            | 453                                                                            |
| $R_1$ [ $I > 2\sigma(I)$ ], $wR_2$ [ $I > 2\sigma(I)$ ] <sup>a,b</sup> | 0.0241, 0.0570                                                                 | 0.0282, 0.0651                                                                  | 0.0460, 0.1325                                                                 | 0.0714, 0.2009                                                                 |
| $R_1$ (all data), $wR_2$ (all data) <sup>a,b</sup>                     | 0.0288, 0.0596                                                                 | 0.0369, 0.0696                                                                  | 0.0567, 0.1606                                                                 | 0.0750, 0.2032                                                                 |
| $(\Delta/\sigma)_{\text{max}}$                                         | 0.001                                                                          | 0.001                                                                           | 0.000                                                                          | 0.002                                                                          |
| $\Delta\rho_{\text{max}}/\Delta\rho_{\text{min}}$ (e Å <sup>-3</sup> ) | 0.759 / -0.388                                                                 | 0.580 / -0.740                                                                  | 0.867 / -1.197                                                                 | 3.393, -2.629                                                                  |
| CCDC number                                                            | 2278244                                                                        | 2278245                                                                         | 2278246                                                                        | 2278247                                                                        |

<sup>a</sup>  $R_1 = \Sigma(|F_o| - |F_c|) / \Sigma(|F_o|)$ .

<sup>b</sup>  $wR_2 = \{\Sigma[w(F_o^2 - F_c^2)^2] / \Sigma[w(F_o^2)]\}^{1/2}$ ,  $w = 1 / [\sigma^2(F_o^2) + (aP)^2 + bP]$ , where  $P = [\max(F_o^2, 0) + 2 F_c^2] / 3$ .

**Table S2.** Selected bond distances (Å) and angles (°) for complex **1**.

| <b>Bond distances (Å)</b> |          |
|---------------------------|----------|
| Dy1-O1                    | 2.286(2) |
| Dy1-O2                    | 2.445(3) |
| Dy1-O4                    | 2.476(4) |
| Dy1-O5                    | 2.486(3) |
| Dy1-O6                    | 2.456(2) |
| Dy1-O8                    | 2.331(2) |
| Dy1-O8'                   | 2.332(3) |
| Dy1-O9                    | 2.430(2) |
| Dy1-O10'                  | 2.456(2) |
| <b>Bond angles (°)</b>    |          |
| O1-Dy1-O10'               | 90.8(9)  |
| O1-Dy1-O9                 | 80.9(0)  |
| O9-Dy1-O8                 | 65.3(7)  |
| O8'-Dy1-O8                | 60.9(9)  |
| O8-Dy1-O10'               | 64.5(4)  |

Symmetry code: (') -x, -y, -z.

**Table S3.** Selected bond distances (Å) and angles (°) for complex **2·2MeCN**.

| <b>Bond distances (Å)</b> |          |
|---------------------------|----------|
| Dy1-O1                    | 2.441(2) |
| Dy1-O2'                   | 2.364(2) |
| Dy1-O2                    | 2.377(2) |
| Dy1-O3'                   | 2.469(2) |
| Dy1-O4                    | 2.433(3) |
| Dy1-O5                    | 2.518(3) |
| Dy1-O7                    | 2.452(3) |
| Dy1-O8                    | 2.575(3) |
| Dy1-O10                   | 2.426(3) |

|                                |          |
|--------------------------------|----------|
| Dy1-O12                        | 2.516(3) |
| <b>Bond angles (°)</b>         |          |
| O2-Dy1-O3'                     | 64.1(1)  |
| O2-Dy1-O2'                     | 58.8(1)  |
| O2-Dy1-O1                      | 64.3(1)  |
| O1-Dy1-O8                      | 64.9(1)  |
| O8-Dy1-O7                      | 50.2(1)  |
| O7-Dy1-O3                      | 67.6(1)  |
| Symmetry code: (') -x, -y, -z. |          |

**Table S4.** Selected bond distances (Å) and angles (°) for complex **3**·2DMF.

|                                |          |
|--------------------------------|----------|
| <b>Bond distances (Å)</b>      |          |
| Dy1-O2                         | 2.362(4) |
| Dy1-O2'                        | 2.417(4) |
| Dy1-O4                         | 2.396(4) |
| Dy1-O1                         | 2.507(5) |
| Dy1-O5                         | 2.332(4) |
| Dy1-O7                         | 2.535(5) |
| Dy1-O8                         | 2.483(5) |
| Dy1-O3'                        | 2.442(5) |
| Dy1-O1W                        | 2.480(5) |
| <b>Bond angles (°)</b>         |          |
| O2-Dy1-O1                      | 64.0(2)  |
| O1-Dy1-O4                      | 80.4(2)  |
| O4-Dy1-O3                      | 84.1(2)  |
| O3-Dy1-O2                      | 64.0(2)  |
| O2-Dy1-O2'                     | 62.1(2)  |
| O8-Dy1-O7                      | 50.3(2)  |
| O4-Dy1-O5                      | 65.7(2)  |
| Symmetry code: (') -x, -y, -z. |          |

**Table S5.** Selected bond distances (Å) and angles (°) for complex 4·2DMF.

| <b>Bond distances (Å)</b> |          |
|---------------------------|----------|
| Dy1-O1                    | 2.384(6) |
| Dy1-O1'                   | 2.447(6) |
| Dy1-O2'                   | 2.509(6) |
| Dy1-O3                    | 2.522(7) |
| Dy1-O4                    | 2.436(7) |
| Dy1-O5                    | 2.309(7) |
| Dy1-O7                    | 2.337(6) |
| Dy1-O8                    | 2.443(7) |
| Dy1-O11                   | 2.429(7) |
| <b>Bond angles (°)</b>    |          |
| O1-Dy1-O3                 | 63.8(2)  |
| O3-Dy1-O8                 | 67.3(2)  |
| O8-Dy1-O2'                | 91.9(2)  |
| O2-Dy1-O1                 | 63.0(2)  |
| O7-Dy1-O8                 | 65.6(2)  |
| O4-Dy1-O5                 | 66.0(2)  |
| O1-Dy1-O1'                | 62.4(2)  |

Symmetry code: (') -x, -y, -z.

**Table S6.** Continuous Shape Measures (CShM) values for the potential coordination polyhedra of the 9-coordinate Dy<sup>III</sup> centers in the structures of complexes **1**, **3**·2DMF and **4**·2DMF.

| Polyhedron <sup>a,b</sup> | Dy1 / Dy1' (1) | Dy1 / Dy1' (3) | Dy1 / Dy1' (4) |
|---------------------------|----------------|----------------|----------------|
| EP                        | 35.25          | 31.63          | 32.78          |
| OPY                       | 23.54          | 23.37          | 23.8           |
| HBPY                      | 14.91          | 15.33          | 17.42          |
| JTC                       | 14.8           | 13.88          | 15.50          |
| JCCU                      | 8.32           | 7.56           | 7.00           |
| CCU                       | 6.47           | 6.23           | 5.75           |
| JCSAPR                    | 4.79           | 5.02           | 3.14           |
| CSAPR                     | 3.52           | 4.06           | 2.25           |
| JTCTPR                    | 6.27           | 4.26           | 2.99           |
| <b>TCTPR</b>              | 4.53           | 4.00           | <b>2.05</b>    |
| JTDIC                     | 9.8            | 10.68          | 12.29          |
| HH                        | 6.87           | 5.32           | 7.60           |
| <b>MFF</b>                | <b>2.73</b>    | <b>3.29</b>    | 2.49           |

<sup>a</sup> Abbreviations: EP, Enneagon; OPY, Octagonal pyramid; HBPY, Heptagonal bipyramid; JTC, Johnson triangular cupola; JCCU, Capped cube; CCU, Spherical-relaxed capped cube; JCSAPR, Capped square antiprism, CSAPR-9, Spherical capped square antiprism; JTCTPR, Tricapped trigonal prism; TCTPR, Spherical tricapped trigonal prism; JTDIC, Tridiminished icosahedron, HH, Hula-hoop; MFF, Muffin. <sup>b</sup> The values in boldface indicate the closest polyhedron according to the Continuous Shape Measures.

**Table S7.** Continuous Shape Measures (CShM) values for the potential coordination polyhedra of the 10-coordinate Dy<sup>III</sup> centers in the structure of complex **2**·2MeCN

| Polyhedron <sup>a,b</sup> | Dy1 / Dy1' (2) |
|---------------------------|----------------|
| DP                        | 35.25          |
| EPY                       | 25.28          |
| OBPY                      | 16.41          |
| PPR                       | 11.48          |
| PAPR                      | 10.78          |
| JBCCU                     | 9.03           |
| JBCSAPR                   | 4.51           |
| JMBIC                     | 6.46           |
| JATDI                     | 18.12          |
| JSPC                      | 3.55           |
| SDD                       | 3.12           |
| <b>TD</b>                 | <b>2.24</b>    |
| HD                        | 6.06           |

<sup>a</sup> Abbreviations: DP, Decagone; EPY, Enneagonal pyramid; OBPY, Octagonal bipyramid; PPR, Pentagonal prism; PAPR, Pentagonal antiprism; JBCCU, Bicapped cube; JBCSAPR, Bicapped square antiprism; JMBIC, Metabidiminshed icosahedron; JATDI, Augmented tridiminshed icosahedron; JSPC, Sphenocorona; SDD, Staggered dodecahedron; TD, Tetradecahedron; HD, Hexadecahedron. <sup>b</sup> The value in boldface indicates the closest polyhedron according to the Continuous Shape Measures.

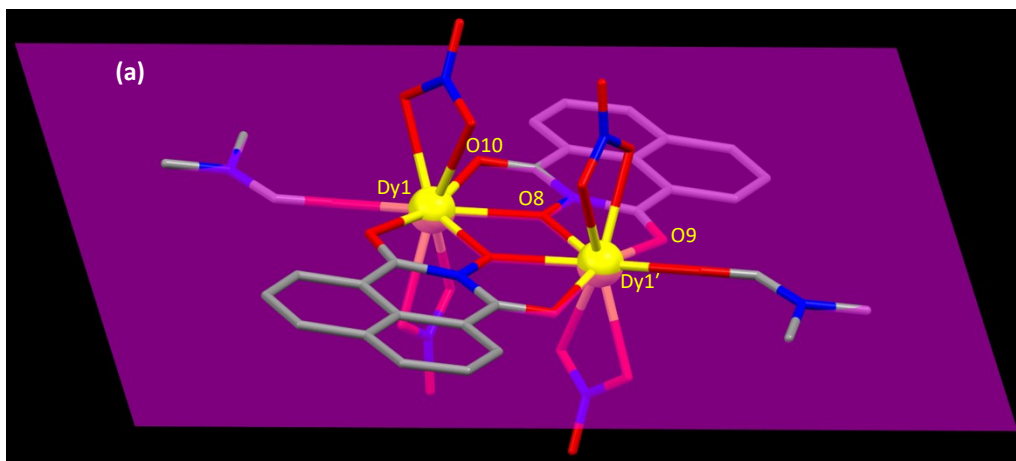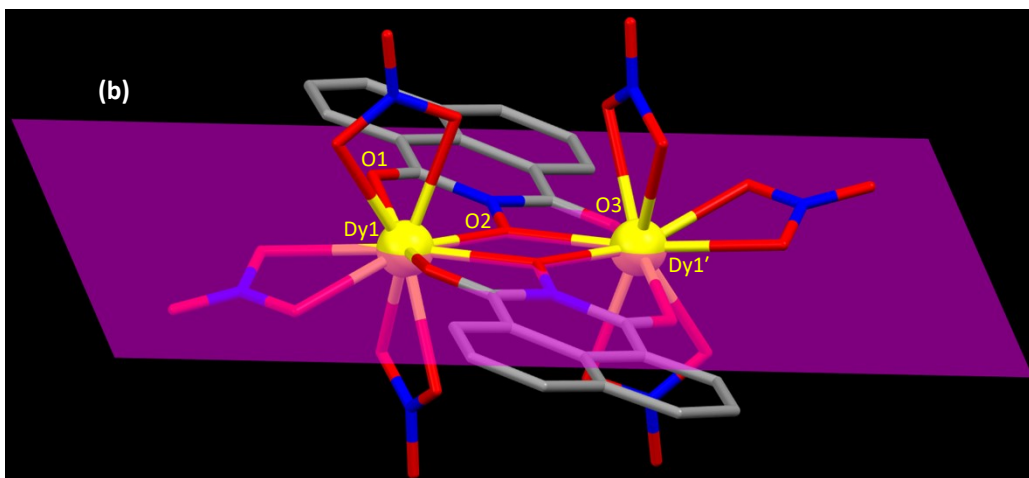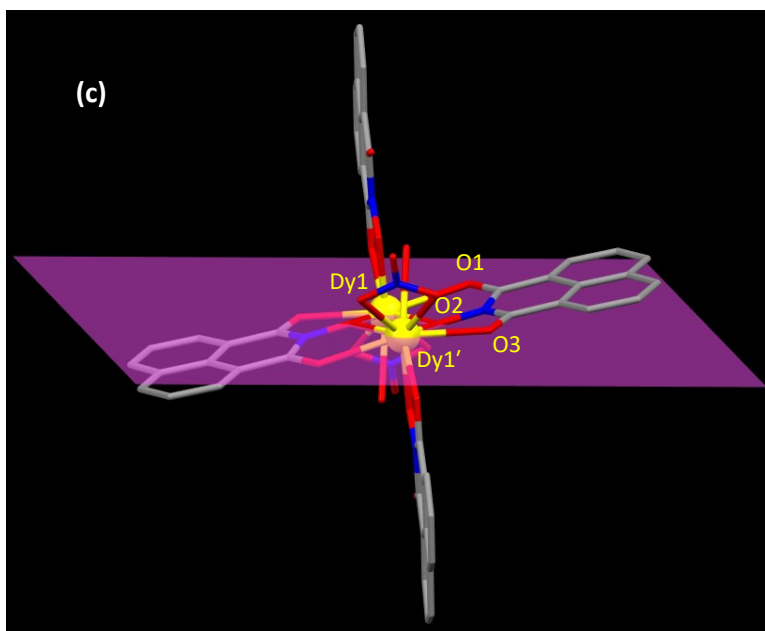



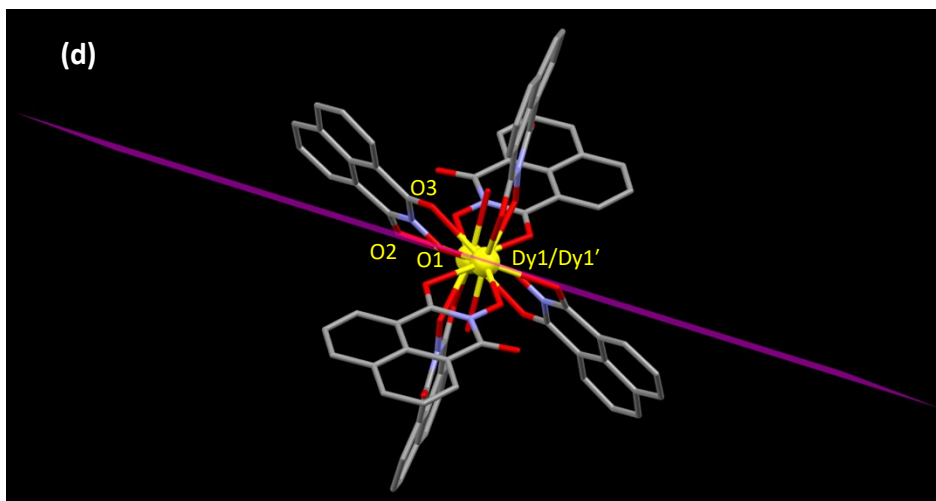

**Figure S1.** Bridging hynad<sup>-</sup> ligands' twist with respect to the central, planar {Dy<sub>2</sub>O<sub>2</sub>} core (highlighted with magenta) in complexes **1** (a), **2** (b), **3** (c), and **4** (d); see the text for the corresponding discussion. Color scheme: Dy<sup>III</sup>, yellow; O, red; N, blue; C, grey. H-atoms are omitted for clarity.

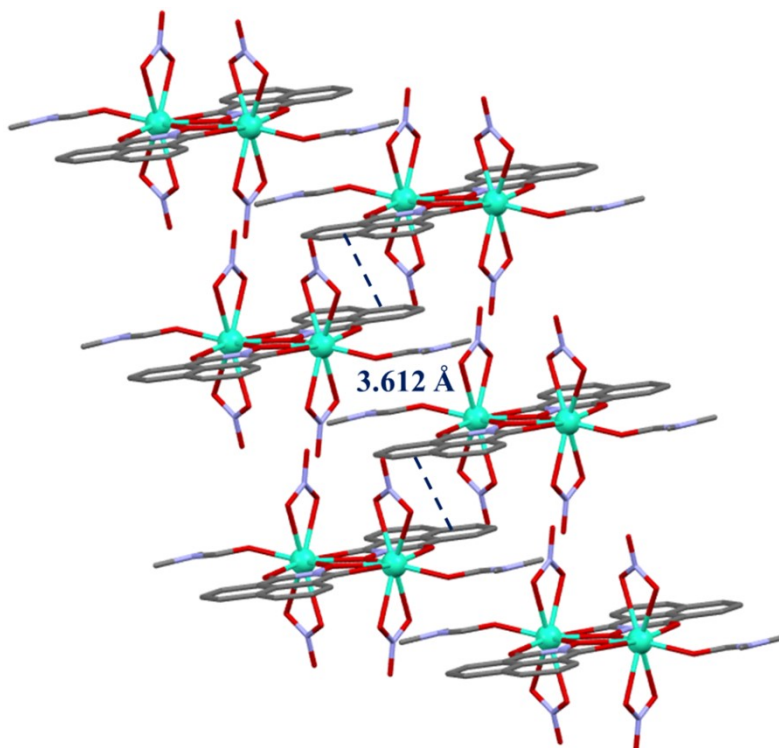

**Figure S2.** A portion of the repeating dimers in the crystal of **1** and their interactions with their neighboring units through strong  $\pi$ - $\pi$  stacking interactions (dark blue dashed lines) along the *c*-axis. The Dy<sup>III</sup> ions are illustrated as cyan spheres.

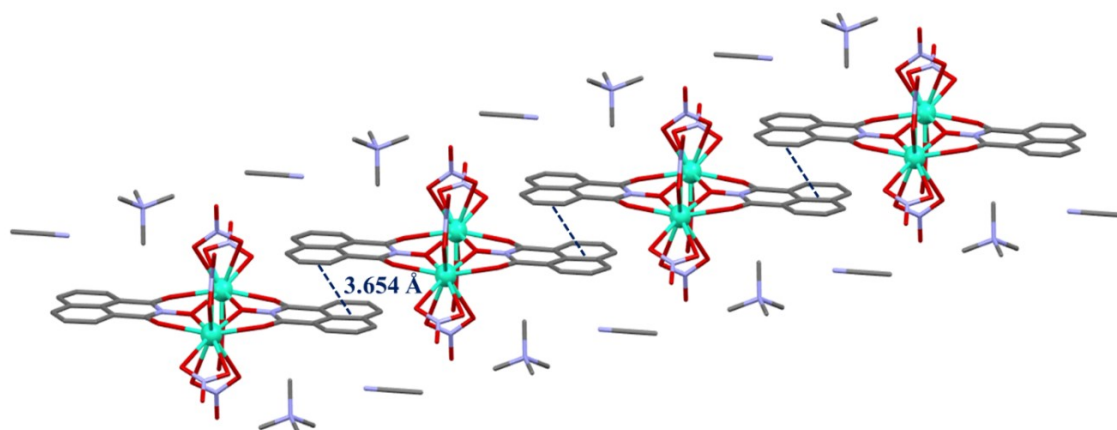

**Figure S3.** A portion of the repeating dimers in the crystal of **2·2MeCN** (including lattice solvents and counterions), and their interactions with their neighboring units through strong  $\pi$ - $\pi$  stacking interactions (dark blue dashed lines) along the  $b$ -axis. The  $\text{Dy}^{\text{III}}$  ions are illustrated as cyan spheres.

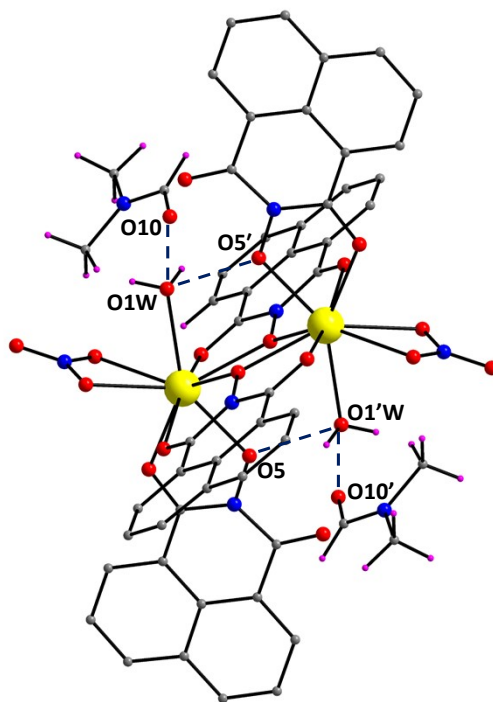

**Figure S4.** Structure of **3·2DMF** showing the intramolecular hydrogen bonding interactions (dark blue dashed lines); see the text for the corresponding discussion. Color scheme:  $\text{Dy}^{\text{III}}$ , yellow; O, red; N, blue; C, grey; H, magenta.

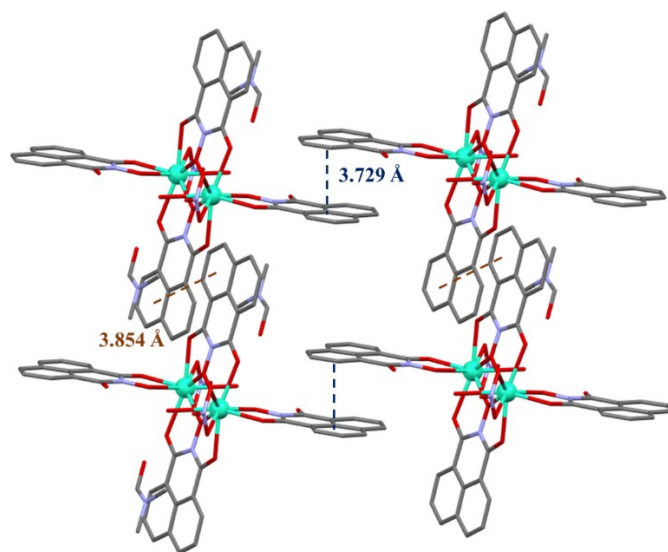

**Figure S5.** A portion of the repeating dimers in the crystal of **3**·2DMF (including lattice solvents), and their interactions with their neighboring units through  $\pi$ - $\pi$  stacking interactions along the *c*- (dark blue dashed lines) and *a*-axes (brown dashed lines). The Dy<sup>III</sup> ions are illustrated as cyan spheres.

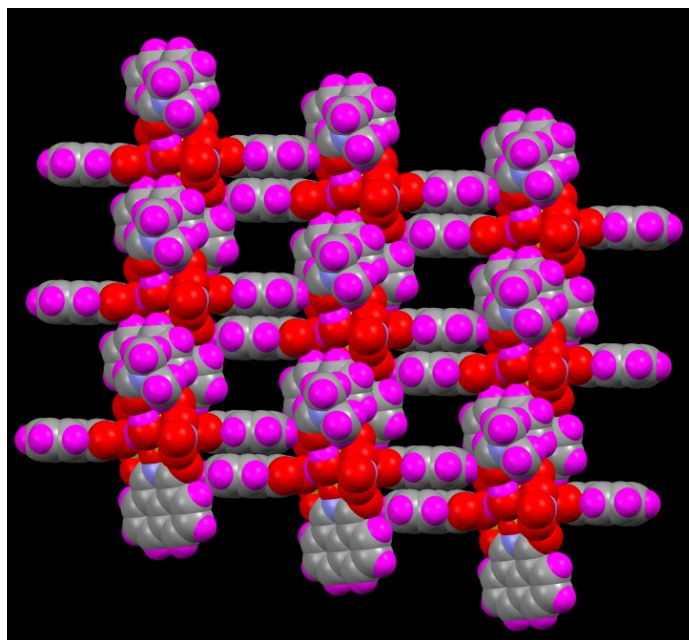

**Figure S6.** A small portion of the 2-D porous framework created by the strong intermolecular  $\pi$ - $\pi$  stacking interactions between neighboring  $\{\text{Dy}_2\}$  molecules in the crystal of **3**·2DMF. Color scheme: Dy<sup>III</sup>, yellow; O, red; N, blue; C, grey; H, magenta.

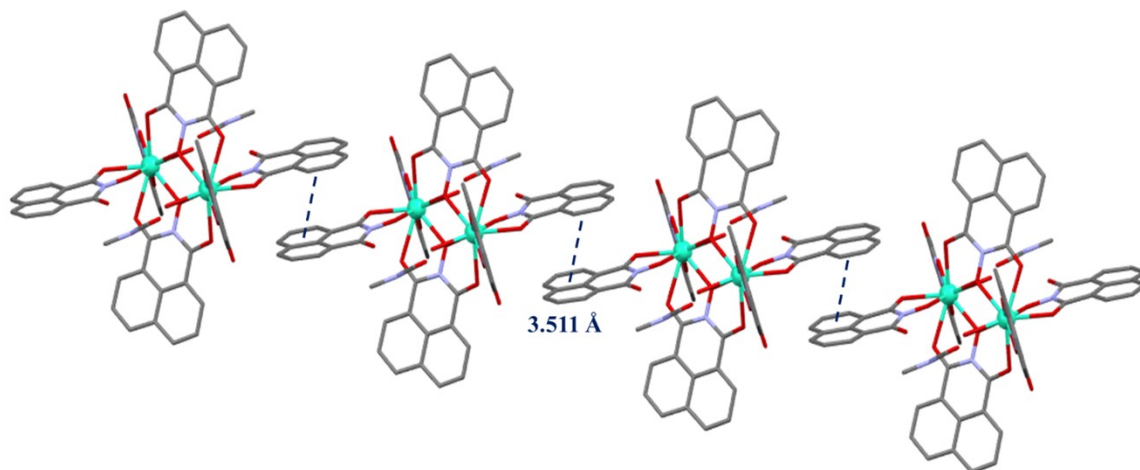

**Figure S7.** A portion of the repeating dimers in the crystal of 4·2DMF (including lattice solvents), and their interactions with the neighboring units through strong  $\pi$ - $\pi$  stacking interactions (dark blue dashed lines) along the *c*-axis. The Dy<sup>III</sup> ions are illustrated as cyan spheres.

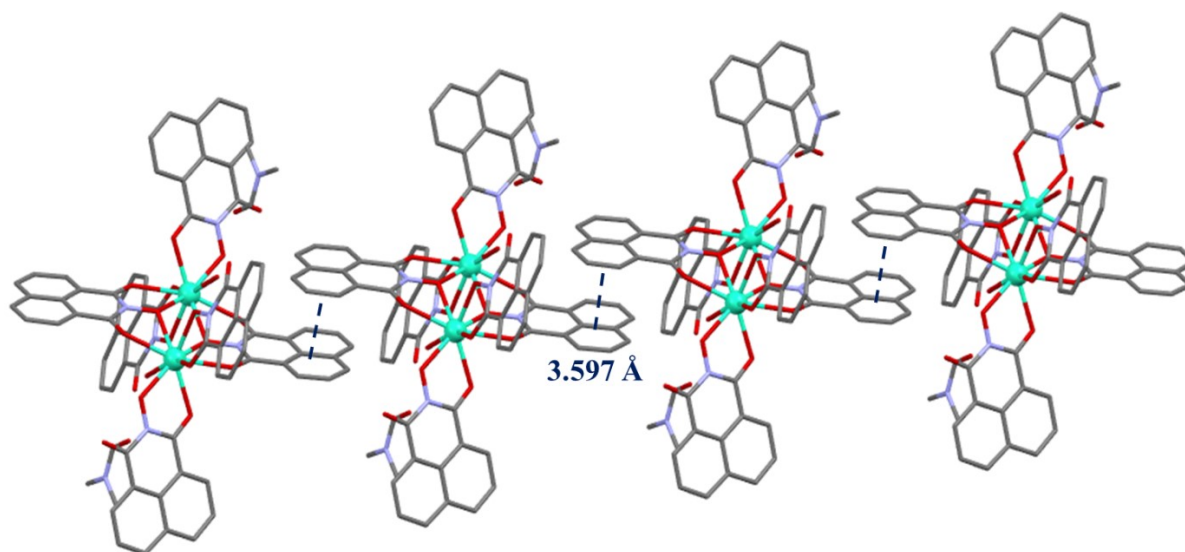

**Figure S8.** A portion of the repeating dimers in the crystal of 4·2DMF (including lattice solvents), and their interactions with the neighboring units through strong  $\pi$ - $\pi$  stacking interactions (dark blue dashed lines) along the *a*-axis. The Dy<sup>III</sup> ions are illustrated as cyan spheres.

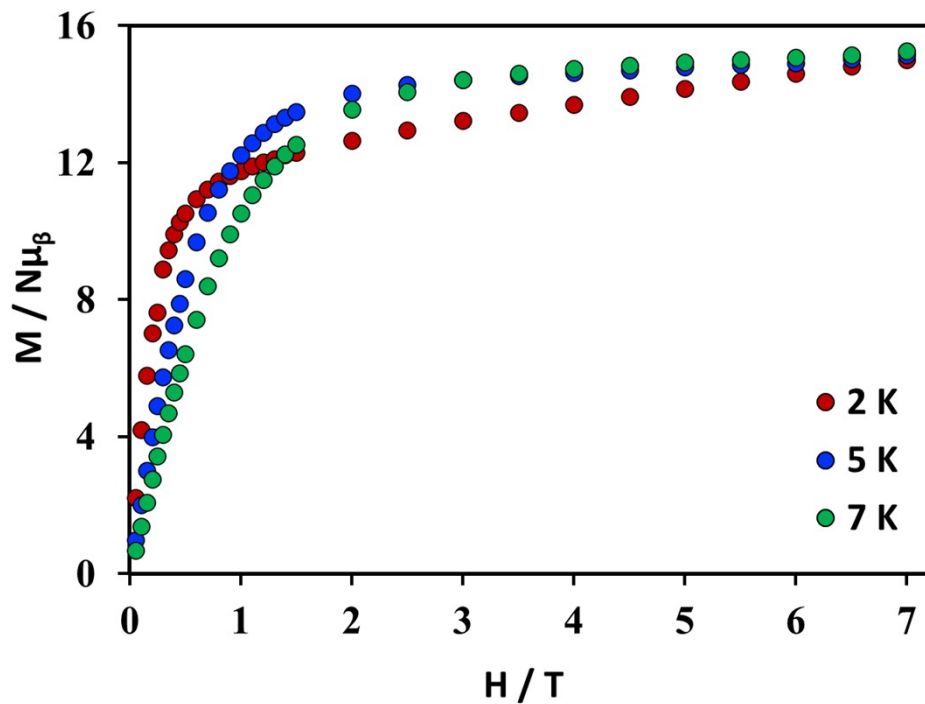

**Figure S9.** Plots of magnetization ( $M$ ) vs field ( $H$ ) for complex 1 at three different low temperatures.

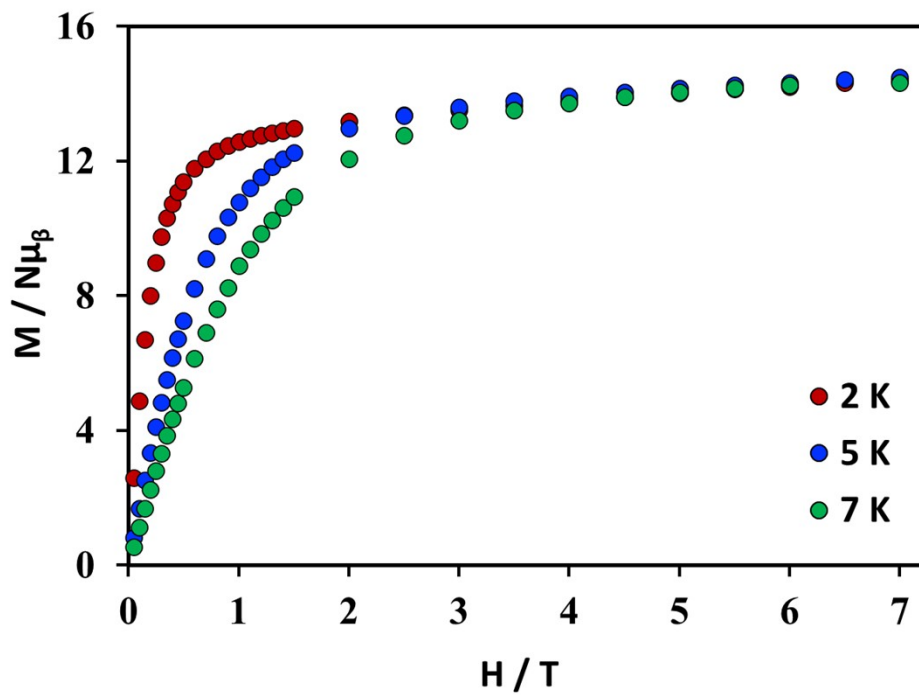

**Figure S10.** Plots of magnetization ( $M$ ) vs field ( $H$ ) for complex 2 at three different low temperatures.

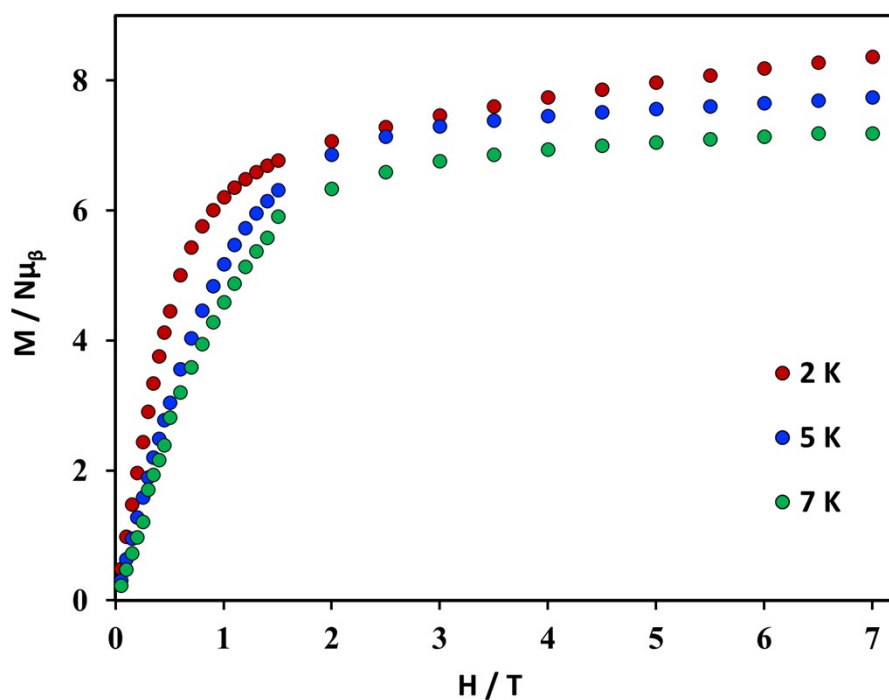

**Figure S11.** Plots of magnetization ( $M$ ) vs field ( $H$ ) for complex 3 at three different low temperatures.

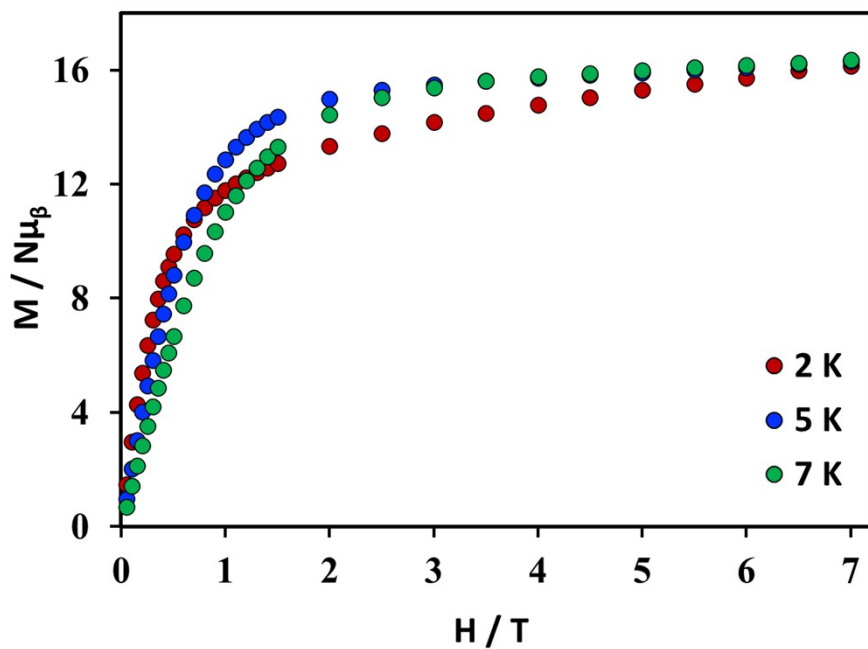

**Figure S12.** Plots of magnetization ( $M$ ) vs field ( $H$ ) for complex 4 at three different low temperatures.

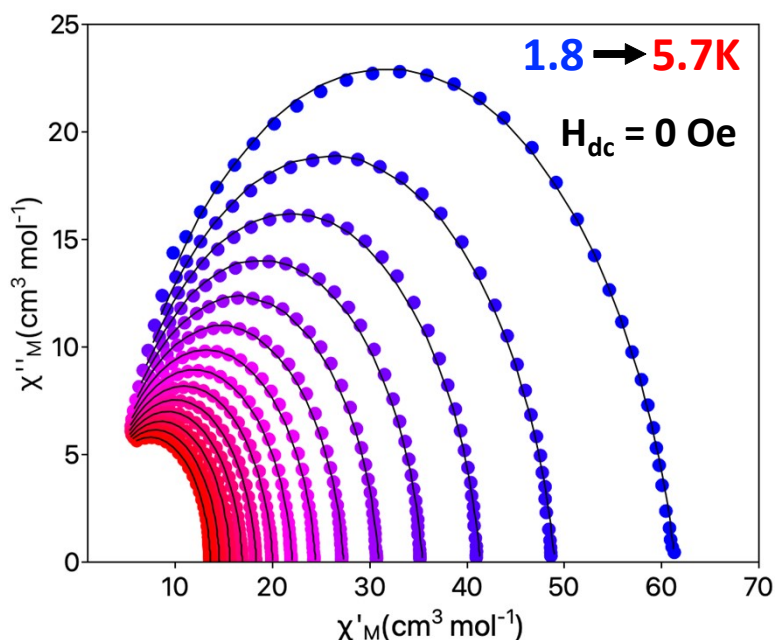

**Figure S13.** Cole–Cole plot for complex 1 obtained using the *ac* susceptibility data in zero applied *dc* field at the temperature range 1.8–5.7 K. The solid lines correspond to the best fit obtained with a generalized Debye model (see the text for the fit parameters).

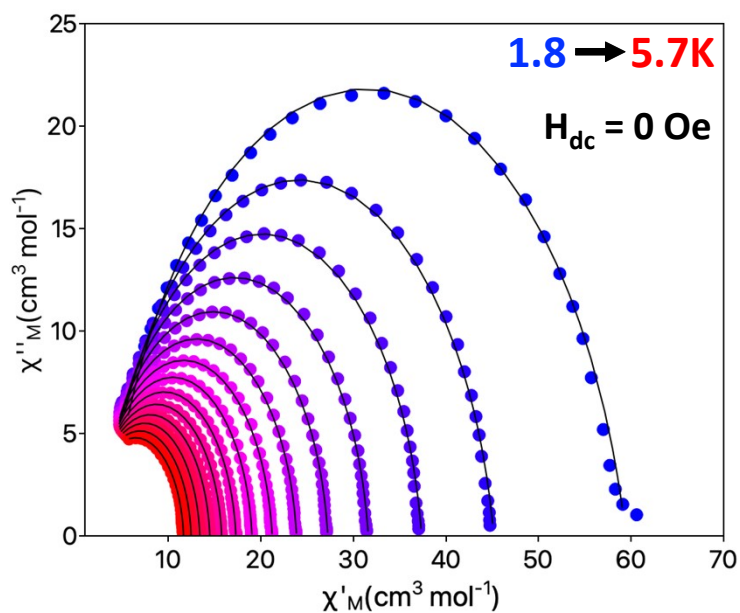

**Figure S14.** Cole–Cole plot for complex 2 obtained using the *ac* susceptibility data in zero applied *dc* field at the temperature range 1.8–5.7 K. The solid lines correspond to the best fit obtained with a generalized Debye model (see the text for the fit parameters).



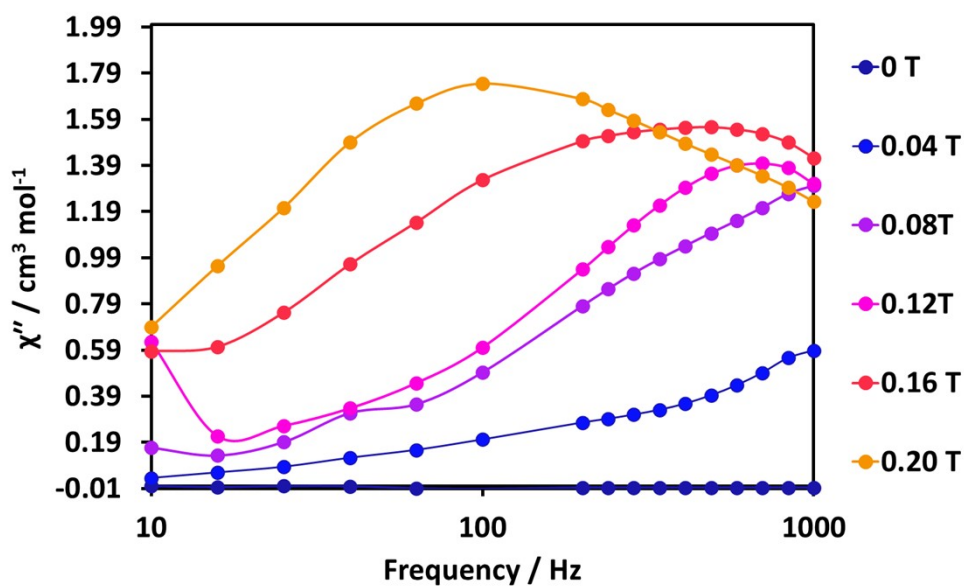

**Figure S15.** Field dependence of the out-of-phase magnetic susceptibility ( $\chi''$ ) vs frequency for complex **3** at 2 K.

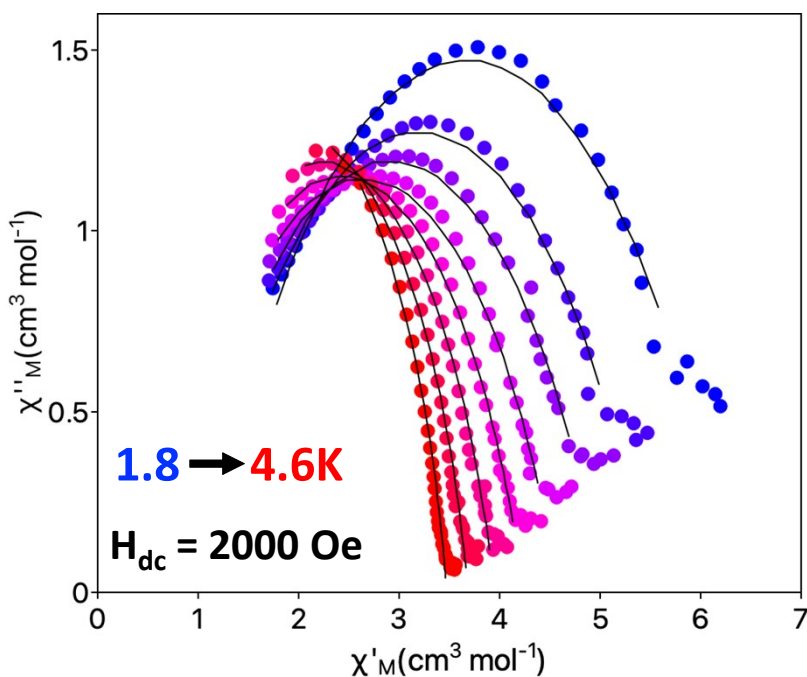

**Figure S16.** Cole–Cole plot for complex **3** obtained using the *ac* susceptibility data in 2000 Oe applied *dc* field at the temperature range 1.8–4.6 K. The solid lines correspond to the best fit obtained with a generalized Debye model (see the text for the fit parameters).



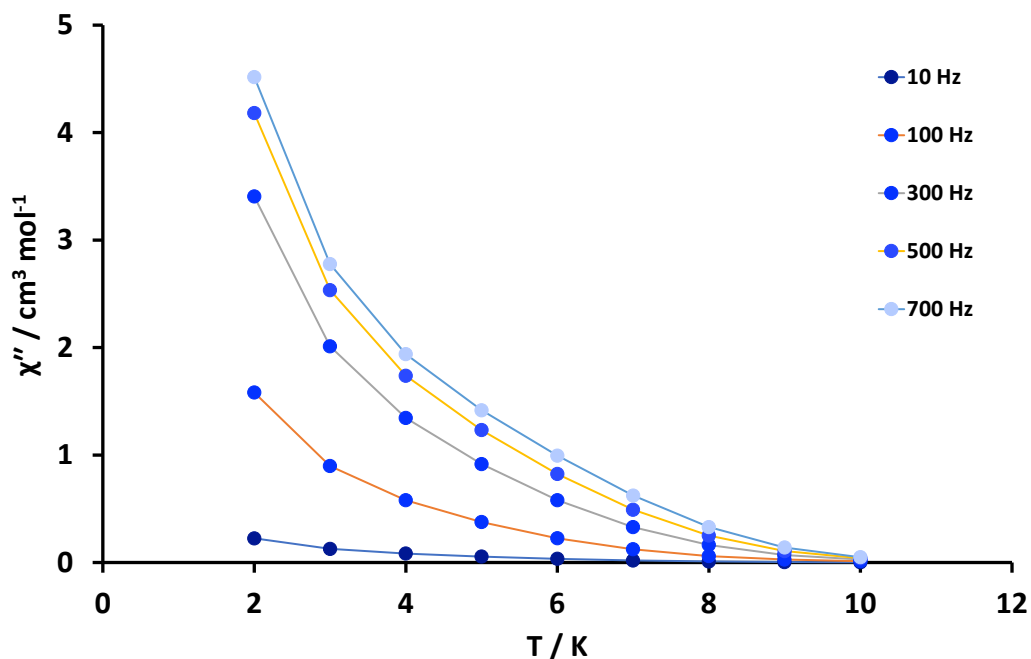

**Figure S17.** Temperature dependence of the out-of-phase ( $\chi_M''$ ) *ac* magnetic susceptibility in zero *dc* field for **4**, measured in a 3.0 G *ac* field oscillating at the indicated frequencies. The solid lines are guides only.

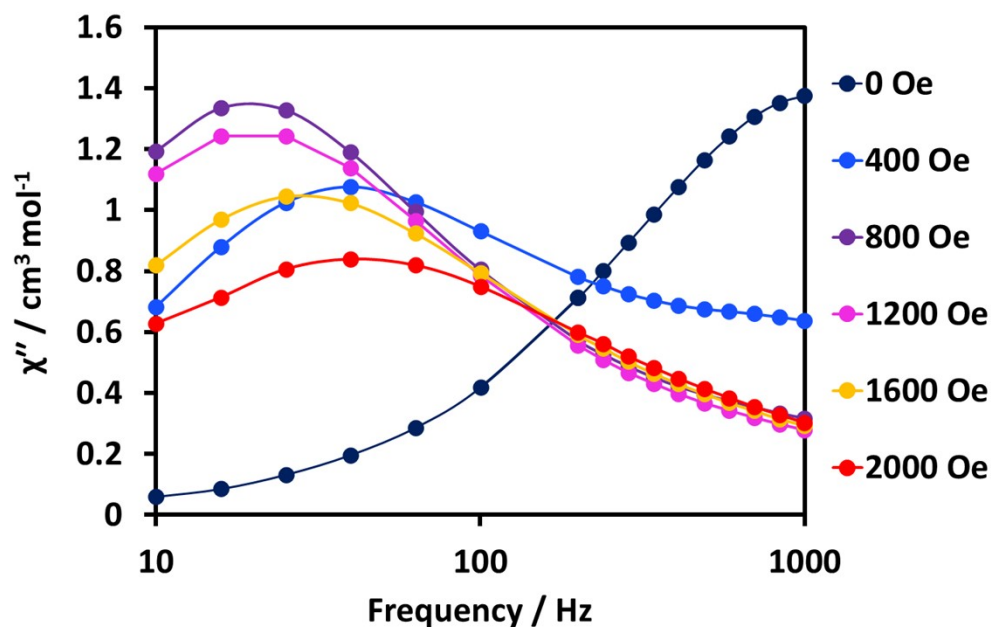

**Figure S18.** Field dependence of the out-of-phase magnetic susceptibility ( $\chi''$ ) vs frequency for complex **4** at 2 K.

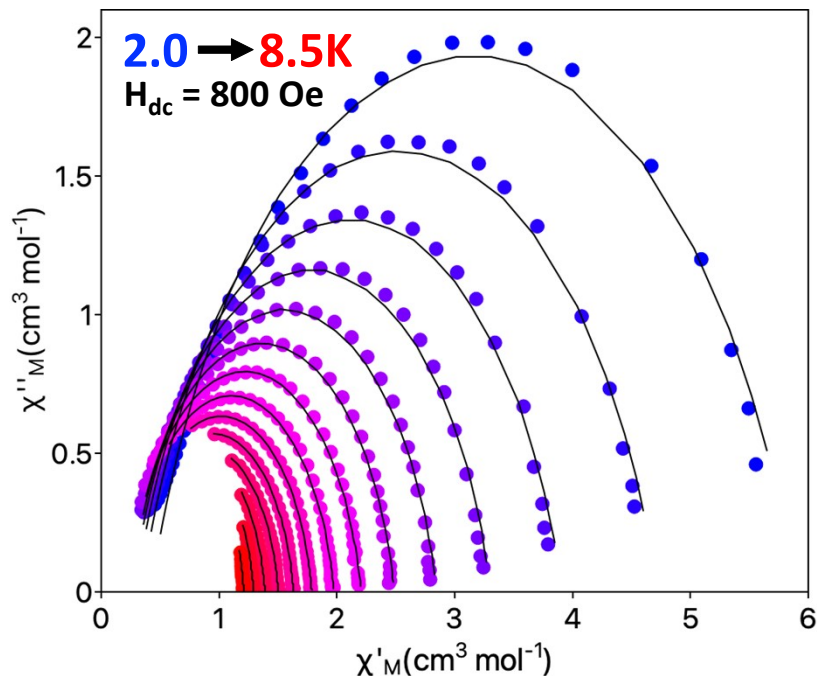

**Figure S19.** Cole–Cole plot for complex **4** obtained using the *ac* susceptibility data under an 800 Oe applied *dc* field over the temperature range 2.0–8.5 K. The solid lines correspond to the best fit obtained with a generalized Debye model (see the text for the fit parameters).

**Table S8.** Cole-Cole fit values of complex **1** between 1.8–5.7 K under zero applied *dc* field.

| <i>T</i> / K | $\chi_s$ / emu mol <sup>-1</sup> | $\chi_T$ / emu mol <sup>-1</sup> | $\tau$ / s | $\alpha$ | Residual |
|--------------|----------------------------------|----------------------------------|------------|----------|----------|
| 1.8          | 2.27E+00                         | 6.14E+01                         | 6.96E-04   | 1.61E-01 | 3.37E+00 |
| 2.1          | 2.48E+00                         | 4.90E+01                         | 6.16E-04   | 1.32E-01 | 4.60E+00 |
| 2.4          | 2.44E+00                         | 4.14E+01                         | 5.64E-04   | 1.16E-01 | 4.63E+00 |
| 2.7          | 2.32E+00                         | 3.54E+01                         | 5.23E-04   | 1.04E-01 | 3.60E+00 |
| 3            | 2.17E+00                         | 3.09E+01                         | 4.87E-04   | 9.60E-02 | 2.79E+00 |
| 3.3          | 2.06E+00                         | 2.73E+01                         | 4.56E-04   | 8.83E-02 | 2.08E+00 |
| 3.6          | 1.91E+00                         | 2.44E+01                         | 4.26E-04   | 8.29E-02 | 1.57E+00 |
| 3.9          | 1.82E+00                         | 2.20E+01                         | 3.97E-04   | 7.67E-02 | 1.09E+00 |
| 4.2          | 1.74E+00                         | 2.00E+01                         | 3.68E-04   | 7.00E-02 | 7.86E-01 |
| 4.5          | 1.66E+00                         | 1.83E+01                         | 3.38E-04   | 6.30E-02 | 5.88E-01 |
| 4.8          | 1.57E+00                         | 1.69E+01                         | 3.07E-04   | 5.66E-02 | 4.04E-01 |
| 5.1          | 1.46E+00                         | 1.56E+01                         | 2.73E-04   | 5.05E-02 | 2.60E-01 |

|     |          |          |          |          |          |
|-----|----------|----------|----------|----------|----------|
| 5.4 | 1.36E+00 | 1.46E+01 | 2.40E-04 | 4.41E-02 | 1.67E-01 |
| 5.7 | 1.25E+00 | 1.36E+01 | 2.08E-04 | 3.84E-02 | 1.07E-01 |

**Table S9.** Cole-Cole fit values of complex **2** between 1.8–5.7 K under zero applied *dc* field.

| <i>T</i> / K | $\chi_s$ / emu mol <sup>-1</sup> | $\chi_T$ / emu mol <sup>-1</sup> | $\tau$ / s | $\alpha$ | Residual |
|--------------|----------------------------------|----------------------------------|------------|----------|----------|
| 1.8          | 2.27E+00                         | 6.14E+01                         | 6.96E-04   | 1.61E-01 | 3.37E+00 |
| 2.1          | 2.48E+00                         | 4.90E+01                         | 6.16E-04   | 1.32E-01 | 4.60E+00 |
| 2.4          | 2.44E+00                         | 4.14E+01                         | 5.64E-04   | 1.16E-01 | 4.63E+00 |
| 2.7          | 2.32E+00                         | 3.54E+01                         | 5.23E-04   | 1.04E-01 | 3.60E+00 |
| 3            | 2.17E+00                         | 3.09E+01                         | 4.87E-04   | 9.60E-02 | 2.79E+00 |
| 3.3          | 2.06E+00                         | 2.73E+01                         | 4.56E-04   | 8.83E-02 | 2.08E+00 |
| 3.6          | 1.91E+00                         | 2.44E+01                         | 4.26E-04   | 8.29E-02 | 1.57E+00 |
| 3.9          | 1.82E+00                         | 2.20E+01                         | 3.97E-04   | 7.67E-02 | 1.09E+00 |
| 4.2          | 1.74E+00                         | 2.00E+01                         | 3.68E-04   | 7.00E-02 | 7.86E-01 |
| 4.5          | 1.66E+00                         | 1.83E+01                         | 3.38E-04   | 6.30E-02 | 5.88E-01 |
| 4.8          | 1.57E+00                         | 1.69E+01                         | 3.07E-04   | 5.66E-02 | 4.04E-01 |
| 5.1          | 1.46E+00                         | 1.56E+01                         | 2.73E-04   | 5.05E-02 | 2.60E-01 |
| 5.4          | 1.36E+00                         | 1.46E+01                         | 2.40E-04   | 4.41E-02 | 1.67E-01 |
| 5.7          | 1.25E+00                         | 1.36E+01                         | 2.08E-04   | 3.84E-02 | 1.07E-01 |

**Table S10.** Cole-Cole fit values of complex **3** between 1.8–4.6 K under an applied *dc* field of 2000 Oe.

| <i>T</i> / K | $\chi_s$ / emu mol <sup>-1</sup> | $\chi_T$ / emu mol <sup>-1</sup> | $\tau$ / s | $\alpha$ | Residual |
|--------------|----------------------------------|----------------------------------|------------|----------|----------|
| 1.8          | 1.10E+00                         | 6.25E+00                         | 1.69E-03   | 3.40E-01 | 8.34E-02 |
| 2.2          | 9.35E-01                         | 5.47E+00                         | 1.16E-03   | 3.49E-01 | 6.29E-02 |
| 2.6          | 8.28E-01                         | 5.01E+00                         | 7.95E-04   | 3.40E-01 | 5.83E-02 |
| 3            | 7.03E-01                         | 4.58E+00                         | 5.20E-04   | 3.21E-01 | 4.23E-02 |
| 3.4          | 6.19E-01                         | 4.23E+00                         | 3.40E-04   | 2.79E-01 | 1.98E-02 |
| 3.8          | 4.83E-01                         | 3.95E+00                         | 2.14E-04   | 2.34E-01 | 2.79E-02 |
| 4.2          | 2.39E-01                         | 3.69E+00                         | 1.29E-04   | 1.93E-01 | 2.80E-02 |
| 4.6          | 6.78E-07                         | 3.47E+00                         | 8.04E-05   | 1.56E-01 | 2.46E-02 |

**Table S11.** Cole-Cole fit values of complex **4** between 2.0-8.5 K under an applied *dc* field of 800 Oe.

| $T / \text{K}$ | $\chi_s / \text{emu mol}^{-1}$ | $\chi_T / \text{emu mol}^{-1}$ | $\tau / \text{s}$ | $\alpha$ | Residual |
|----------------|--------------------------------|--------------------------------|-------------------|----------|----------|
| 2.0            | 1.25E+00                       | 1.68E+01                       | 9.21E-03          | 2.11E-01 | 1.04E+00 |
| 2.5            | 1.01E+00                       | 1.35E+01                       | 6.11E-03          | 1.96E-01 | 5.60E-01 |
| 3.0            | 8.84E-01                       | 1.12E+01                       | 4.31E-03          | 1.81E-01 | 3.98E-01 |
| 3.5            | 8.04E-01                       | 9.45E+00                       | 3.01E-03          | 1.65E-01 | 2.83E-01 |
| 4.0            | 7.61E-01                       | 8.14E+00                       | 2.00E-03          | 1.48E-01 | 2.03E-01 |
| 4.5            | 7.28E-01                       | 7.11E+00                       | 1.24E-03          | 1.36E-01 | 1.31E-01 |
| 5.0            | 7.20E-01                       | 6.31E+00                       | 7.41E-04          | 1.29E-01 | 7.83E-02 |
| 5.5            | 7.46E-01                       | 5.65E+00                       | 4.42E-04          | 1.21E-01 | 4.39E-02 |
| 6.0            | 8.12E-01                       | 5.11E+00                       | 2.70E-04          | 1.10E-01 | 2.20E-02 |
| 6.5            | 8.66E-01                       | 4.67E+00                       | 1.68E-04          | 9.94E-02 | 1.13E-02 |
| 7.0            | 8.27E-01                       | 4.30E+00                       | 1.03E-04          | 9.57E-02 | 5.11E-03 |
| 7.5            | 5.73E-01                       | 3.98E+00                       | 5.80E-05          | 9.49E-02 | 3.52E-03 |
| 8.0            | 7.01E-14                       | 3.70E+00                       | 2.89E-05          | 9.69E-02 | 1.89E-03 |
| 8.5            | 9.36E-14                       | 3.46E+00                       | 1.81E-05          | 7.89E-02 | 1.98E-03 |
